# Supplementary material for: A reverse ELISA based on quantum dot-labeled TetR for rapid detection of tetracycline
Source: Research Square preprint supplement (doi:10.21203/rs.3.rs-6827683/v1), 2025-06-12
Supplement: Supplementary file 1 [file 52d4644cb2c0e1013aeee605.docx]

**Supplementary Materials**

**Title：A reverse ELISA based on quantum dot-labeled TetR for rapid detection of tetracycline**

**Supplementary Methods**

**Text S1. Characterization of QD-TetR conjugates**

**S1.1. Transmission electron microscopy analysis**

A total of 25 μL of QD and QD-TetR conjugates obtained in section 2.3 were diluted to a final volume of 2 mL with ddH2O. Prior to TEM analysis, both samples were subjected to negative staining using phosphotungstic acid. Imaging was performed by Nanjing Xianfeng Nanomaterials Technology Co., Ltd., with each sample analyzed in triplicate.

**S1.2. Analysis of Fluorescence Shifts**

Fluorescence measurements were sequentially conducted using a fluorescence spectrophotometer (F97Pro, Shanghai Lengguang Technology Co., Ltd.) at an excitation wavelength of 310 nm. The measurements were performed on both the QD and the QD-TetR conjugates obtained in section 2.4. Emission spectra were recorded in the range of 450 to 750 nm.

**S1.3. Zeta potential analysis**

25 μL of QD and QD-TetR conjugates obtained in section 2.3 were diluted to a final volume of 2 mL with ddH2O. Both samples were subjected to ultrasonic treatment prior to Zeta potential analysis. The Zeta potential analysis was performed by Fanrui Yunzhi Technology (Zhengzhou) Co., Ltd. Each sample was analyzed in triplicate.

**S1.4. Fourier Transform Infrared Spectroscopy**

Firstly, 50 μL of QD was transferred into a 2 mL centrifuge tube, while 800 μL of QD-TetR conjugates, prepared as described in section 2.3, was placed into a separate clean centrifuge tube. The openings of both tubes were sealed with sealing film, allowing for several small air holes. The QD and QD-TetR conjugates were then rapidly frozen in a -80 °C low-temperature freezer for 2 hours before being transferred to a freeze dryer for 48 hours. Following freeze-drying, the dried QD and QD-TetR were mixed and ground with dried KBr in a 1:100 ratio. The resulting mixture was pressed into transparent thin slices for analysis using a Fourier Transform Infrared Spectrometer (Thermo Fisher Scientific Inc., Nicolet iS5).

**Table S1.** ssDNA and TetR sequence used in this study

The red section indicates the *teto* operator sequence

| Name | Sequence (5’-3’) |
| --- | --- |
| 2A | 5′-Biotin-ggtccctatcagtgatagagagg-3′ |
| 2B | 5′-cctctctatcactgatagggacc-3′ |
| 4A | 5′Biotin-gggatccctatcagtgatagagaaggg-3′ |
| 4B | 5′-cccttctctatcactgatagggatccc-3′ |
| 6A | 5′Biotin-gggagatccctatcagtgatagagaagaggg-3′ |
| 6B | 5′-cctctctatcactgatagggacc-3′ |
| 8A | 5′Biotin-gggagacctccctatcagtgatagagaccagaggg-3′ |
| 8B | 5′-ccctctggtctctatcactgatagggaggtctccc-3′ |
| 10A | 5′Biotin-gggagaccactccctatcagtgatagagacaccagaggg-3′ |
| 10B | 5′-ccctctggtgtctctatcactgatagggagtggtctccc-3′ |
| 12A | 5′Biotin-gggagaccacaatccctatcagtgatagagaaacaccagaggg-3′ |
| 12B | 5′-ccctctggtgtttctctatcactgatagggattgtggtctccc-3′ |
| 14A | 5′Biotin-gggagaccacaacgtccctatcagtgatagagagcaacaccagaggg-3′ |
| 14B | 5′-ccctctggtgttgctctctatcactgatagggacgttgtggtctccc-3′ |
| TetR | MSRLDKSKVINSALELLNEVGIEGLTTRKLAQKLGVEQPTLYWHVKNKRALLDALAIEMLDRHHTHFCPLEGESWQDFLRNNAKSFRCALLSHRDGAKVHLGTRPTEKQYETLENQLAFLCQQGFSLENALYALSAVGHFTLGCVLEDQEHQVAKEERETPTTDSMPPLLRQAIELFDHQGAEPAFLFGLELIICGLEKQLKCESGSKLAAALEHHHHHH |

**Table S2.** Coupling reaction systems of QD-COOH and TetR

| Name | Usage concentration | Usage volume |
| --- | --- | --- |
| QD | 8 μM | 25 μL |
| EDC | 50 mg/mL in BBS | 3 μL |
| NHS | 75 mg/mL in BBS | 3 μL |
| BBS | 0.05 M, pH 7.4 | 125 μL |
| Incubate at room temperature in the dark for 30 minutes | | |
| TetR | 186 μM | 1.08 μL |
| Mix and react in a darkroom for 2 hours | | |
| Centrifugation with a 30 KD ultrafiltration tube, collect the substances inside the tube using 400 μL of ddH2O | | |


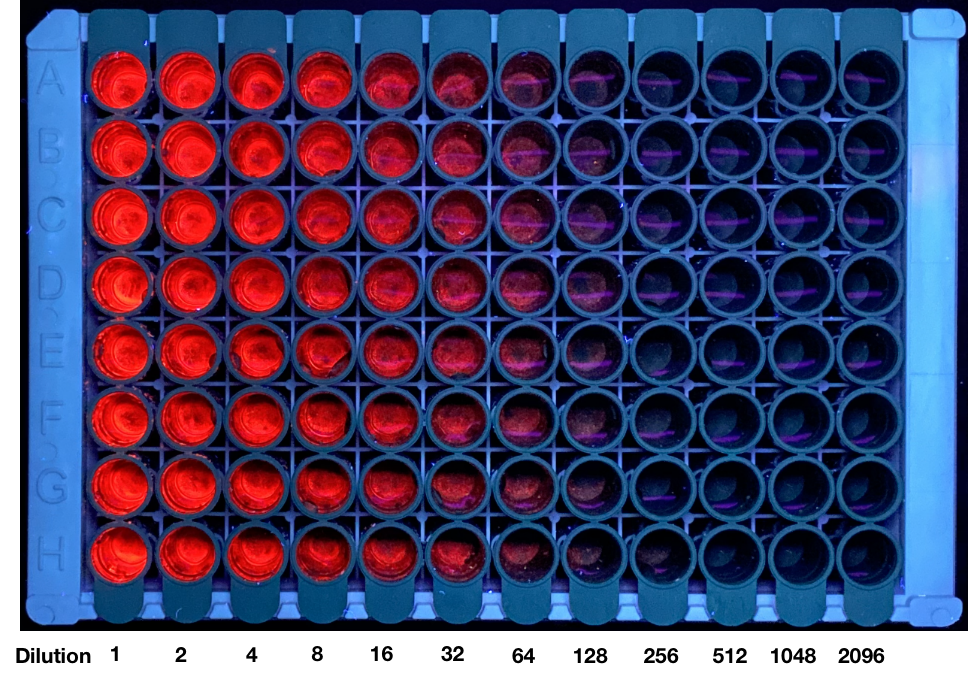


**Figure S1.** Construction of a reverse ELISA using various dilution factors of QD-TetR for semi-quantitative detection. The numbers below indicate the dilution factors of QD-TetR corresponding to each column of the 96-well plate.
